# Supplementary material for: Sulforaphene suppressed cell proliferation and promoted apoptosis of COV362 cells in endometrioid ovarian cancer
Source: PeerJ. 2023 Nov 21;11:e16308. doi: 10.7717/peerj.16308 (PMC10668859; doi:10.7717/peerj.16308)
Supplement: Supplemental Information 3 [file peerj-11-16308-s003.xlsx]

## Sheet: Figure 2A
		METTL3			GAPDH
		1	2	3	4	5	6	7	8	9	10	11	12
	A	24.9944	25.2267	25.02	21.9657	21.9747	22.0194								Control
	B	25.1132	24.8637	24.9149	21.9202	21.8148	21.9386								si-NC
	C	26.2234	25.9836	26.2715	21.8972	21.8474	21.9326								si-METTL3#1
	D	25.8632	25.5734	25.7191	21.8317	21.85	21.6792								si-METTL3#2
	E	25.4621	25.4959	25.7005	21.7118	21.6685	21.6233								si-METTL3#3
	F	25.23	24.9447	25.0004	21.881	21.8832	21.7861								pcDNA3.1
	G	23.9363	23.6338	23.8369	21.7207	21.7156	22.1046								pcDNA3.1-METTL3
	H
									METTL3
	Control	si-NC	si-METTL3#1	si-METTL3#2	si-METTL3#3	pcDNA3.1	pcDNA3.1-METTL3
METTL3	24.9944	25.1132	26.2234	25.8632	25.4621	25.23	23.9363
METTL3	25.2267	24.8637	25.9836	25.5734	25.4959	24.9447	23.6338
METTL3	25.02	24.9149	26.2715	25.7191	25.7005	25.0004	23.8369
GAPDH	21.9657	21.9202	21.8972	21.8317	21.7118	21.881	21.7207
GAPDH	21.9747	21.8148	21.8474	21.85	21.6685	21.8832	21.7156
GAPDH	22.0194	21.9386	21.9326	21.6792	21.6233	21.7861	22.1046
av	21.9866	21.8912	21.8924	21.787	21.6679	21.8501	21.847
ΔCt	3.00779	3.22202	4.33103	4.07627	3.79424	3.37984	2.08926
	3.2401	2.97253	4.09122	3.78647	3.828	3.09461	1.78682
	3.03343	3.0237	4.37904	3.93215	4.03268	3.15023	1.9899
av	3.09378	3.07275	4.2671	3.93163	3.88498	3.20823	1.95533
ΔΔCt	-0.0859814	0.128249	1.23725	0.982493	0.700466	0.286066	-1.00451
	0.146323	-0.12125	0.997444	0.692697	0.734228	0.000835708	-1.30695		GAPDH
	-0.0603419	-0.0700733	1.28527	0.838375	0.938909	0.0564498	-1.10387
2^(-ΔΔCt)	1.06141	0.914941	0.424179	0.506105	0.615374	0.820135	2.00626
	0.90355	1.08768	0.500886	0.618696	0.60114	0.999421	2.47419
	1.04271	1.04977	0.410295	0.559273	0.521627	0.961628	2.14931
av	1.00256	1.01746	0.44512	0.561358	0.57938	0.927061	2.20992
sd	0.086251	0.0907865	0.0487915	0.0563247	0.0505193	0.0945091	0.239778
P		0.846735	0.000653276	0.001784	0.00186921	0.298162	0.000995129

## Sheet: Figure 2B
Protein	Control	si-NC	si-METTL3#1	si-METTL3#2	si-METTL3#3	pcDNA3.1	pcDNA3.1-METTL3
GAPDH	36547.8	33559.4	34755.7	37420	36349.8	34961.3	36962.3
GAPDH	38129	35033.7	36214.9	38913	37894.7	36364.3	38492
GAPDH	35123.1	32147.1	33326.4	35984.3	34917.2	33535.6	35378.2
AV	36600	33580.1	34765.7	37439.1	36387.2	34953.7	36944.2
SD	1503.61	1443.37	1444.25	1464.44	1489.09	1414.39	1556.97
Protein	Control	si-NC	si-METTL3#1	si-METTL3#2	si-METTL3#3	pcDNA3.1	pcDNA3.1-METTL3
METTL3	15983.9	13827.7	2895.95	5597.02	10295.7	17053.2	33136.5
METTL3	14808.8	12925.3	2643.88	5267.33	9649.52	15912.3	30829.2
METTL3	17019.6	14653.9	3062.12	5911.3	10820.8	18106.9	35077
GAPDH	36547.8	33559.4	34755.7	37420	36349.8	34961.3	36962.3
GAPDH	38129	35033.7	36214.9	38913	37894.7	36364.3	38492
GAPDH	35123.1	32147.1	33326.4	35984.3	34917.2	33535.6	35378.2
METTL3/GAPDH	0.437342	0.412038	0.083323	0.149573	0.283241	0.487773	0.896494
METTL3/GAPDH	0.388387	0.36894	0.0730053	0.135362	0.25464	0.43758	0.800925
METTL3/GAPDH	0.484569	0.455839	0.0918825	0.164274	0.309898	0.539931	0.991485
av	0.436766	0.412272	0.0827369	0.149736	0.282593	0.488428	0.896302
Statistical data	1.00132	0.943384	0.190773	0.342456	0.648495	1.11678	2.05257
	0.889233	0.844708	0.16715	0.309918	0.583013	1.00186	1.83376
	1.10945	1.04367	0.21037	0.376116	0.709529	1.2362	2.27006
av	1	0.94392	0.189431	0.34283	0.647012	1.11828	2.05213
sd	0.110113	0.0994809	0.0216415	0.0331002	0.0632707	0.117177	0.21815
P		0.54848	0.000212348	0.000577436	0.0120437	0.271612	0.00283802

## Sheet: Figure 2C
			24h										48h										72h
	Blank (No cells）
			OD值：										OD值：										OD值：
			0.6523	0.7024	0.6763	0.6846	0.7122			0.045			0.8024	0.8324	0.673	0.9092	0.9926			0.0357			0.9457	1.0032	0.6042	0.8481	1.3092			0.0392
			0.6268	0.7075	0.7152	0.5855	0.6778			0.0384			0.7357	0.7703	0.7612	0.735	0.8632			0.0413			0.8698	0.8702	0.727	0.9133	1.1042			0.0396
			0.6267	0.7594	0.6072	0.607	0.6072			0.0395			0.7233	0.8228	0.6681	0.8007	1.0909			0.0391			0.7955	0.9283	0.7589	0.9038	1.296			0.0485
			0.6911	0.6433	0.7734	0.747	0.7024			0.0463			0.8431	0.8436	0.7513	0.7914	0.9241			0.0368			1.0062	1.0606	0.721	1.0627	1.2472			0.0373
			0.6298	0.7204	0.632	0.7225	0.6851			0.046			0.7987	0.8976	0.7025	0.8886	0.8248			0.0338			0.9275	0.8754	0.809	0.9456	1.2387			0.036
			0.7032	0.64	0.7351	0.7075	0.7055			0.0396			0.8736	0.9293	0.5947	0.8124	0.9402			0.0468			0.8457	0.9498	0.7263	0.9114	1.146			0.0487
				Control										Control										Control
				si-NC										si-NC										si-NC
				si-METTL3#1										si-METTL3#1										si-METTL3#1
				pcDNA3.1										pcDNA3.1										pcDNA3.1
				pcDNA3.1-METTL3										pcDNA3.1-METTL3										pcDNA3.1-METTL3
				Control	si-NC	si-METTL3#1	pcDNA3.1	pcDNA3.1-METTL3	Blank (No cells）					Control	si-NC	si-METTL3#1	pcDNA3.1	pcDNA3.1-METTL3	Blank (No cells）					Control	si-NC	si-METTL3#1	pcDNA3.1	pcDNA3.1-METTL3	Blank (No cells）
			1	0.6523	0.7024	0.6763	0.6846	0.7122	0.045				1	0.8024	0.8324	0.673	0.9092	0.9926	0.0357				1	0.9457	1.0032	0.6042	0.8481	1.3092	0.0392
			2	0.6268	0.7075	0.7152	0.5855	0.6778	0.0384				2	0.7357	0.7703	0.7612	0.735	0.8632	0.0413				2	0.8698	0.8702	0.727	0.9133	1.1042	0.0396
			3	0.6267	0.7594	0.6072	0.607	0.6072	0.0395				3	0.7233	0.8228	0.6681	0.8007	1.0909	0.0391				3	0.7955	0.9283	0.7589	0.9038	1.296	0.0485
			4	0.6911	0.6433	0.7734	0.747	0.7024	0.0463				4	0.8431	0.8436	0.7513	0.7914	0.9241	0.0368				4	1.0062	1.0606	0.721	1.0627	1.2472	0.0373
			5	0.6298	0.7204	0.632	0.7225	0.6851	0.046				5	0.7987	0.8976	0.7025	0.8886	0.8248	0.0338				5	0.9275	0.8754	0.809	0.9456	1.2387	0.036
			6	0.7032	0.64	0.7351	0.7075	0.7055	0.0396				6	0.8736	0.9293	0.5947	0.8124	0.9402	0.0468				6	0.8457	0.9498	0.7263	0.9114	1.146	0.0487
			av	0.654983	0.6955	0.689867	0.675683	0.6817	0.0424667				av	0.796133	0.849333	0.6918	0.822883	0.9393	0.0389167				av	0.8984	0.947917	0.7244	0.930817	1.22355	0.04155
			sd	0.0342488	0.04626	0.0632962	0.0651462	0.0387355	0.00366479				sd	0.058668	0.0565583	0.0613427	0.0649399	0.0948227	0.00466623				sd	0.0760113	0.074082	0.0675535	0.0719271	0.0820149	0.00561453
			p		0.115379	0.262553	0.506545	0.849717					p		0.14088	0.0130991	0.471279	0.0324755					p		0.27977	0.00185439	0.465496	6.2866e-05
				Control	si-NC	si-METTL3#1	pcDNA3.1	pcDNA3.1-METTL3						Control	si-NC	si-METTL3#1	pcDNA3.1	pcDNA3.1-METTL3						Control	si-NC	si-METTL3#1	pcDNA3.1	pcDNA3.1-METTL3
			Cell viability	99.5619	107.741	103.48	104.835	109.341					Cell viability	100.828	104.789	83.7387	114.932	125.946					Cell viability	105.52	112.231	65.6649	94.1297	147.943
				95.3988	108.574	109.831	88.6561	103.725						92.019	96.5884	95.3866	91.9266	108.857						96.6622	96.7089	79.9965	101.739	124.018
				95.3824	117.047	92.1989	92.1662	92.1989						90.3814	103.522	83.0916	100.603	138.928						87.9909	103.49	83.7194	100.63	146.403
				105.896	98.0926	119.333	115.023	107.741						106.203	106.269	94.0792	99.3749	116.9						112.581	118.93	79.2963	119.175	140.707
				95.8885	110.68	96.2477	111.023	104.917						100.339	113.4	87.6345	112.211	103.786						103.396	97.3157	89.5664	105.509	139.715
				107.872	97.5538	113.08	108.574	108.247						110.23	117.586	73.3982	102.148	119.026						93.8496	105.999	79.9148	101.517	128.897
			AV	100	106.615	105.695	103.379	104.362					AV	100	107.026	86.2215	103.533	118.907					AV	100	105.779	79.6931	103.783	137.947
			SD	5.59149	7.55244	10.3338	10.6358	6.32399					SD	7.74785	7.46924	8.10108	8.57613	12.5225					SD	8.87102	8.64585	7.88394	8.39436	9.57167
			p		0.115379	0.262553	0.506545	0.849717					p		0.14088	0.0130991	0.471279	0.0324755					p		0.27977	0.00185439	0.465496	6.2866e-05

## Sheet: Figure 2D
	COV362
		Control	si-NC	si-METTL3#1	pcDNA3.1	pcDNA3.1-METTL3
	1	87	96	44	83	156
	2	80	104	39	89	178
	3	94	88	48	76	147
	AV	87	96	43.6667	82.6667	160.333
	SD	7	8	4.50925	6.50641	15.9478
	P		0.216416	0.000838851	0.476152	0.00145035

## Sheet: Figure 2E
		COV362	G0/G1						Multiple Comparisons
			Control	si-NC	si-METTL3#1	pcDNA3.1	pcDNA3.1-METTL3		Tukey HSD
		1	55.96	59.03	79.04	61.43	42.35		Dependent Variable	(I) 组别	(J) 组别	Mean Difference (I-J)	Std. Error	Sig.	95% Confidence Interval
		2	57.1	55.08	76.65	63.05	45.48								Lower Bound	Upper Bound
		3	61.77	60.19	74.73	59.88	44.09		G0G1	A	B	0.176667	1.8722	0.999979	-5.98491	6.33825	S	A	B	-0.583333	1.58473	0.995426	-5.7988	4.63213	G2M	A	B	0.643333	0.953809	0.957633	-2.49573	3.7824
		AV	58.2767	58.1	76.8067	61.4533	43.9733				C	-18.53000*	1.8722	1.3492e-05	-24.6916	-12.3684			C	11.75000*	1.58473	0.000171554	6.53453	16.9655			C	6.77667*	0.953809	0.000245689	3.6376	9.91573
		SD	3.07854	2.67894	2.15927	1.58513	1.56826				D	-3.17667	1.8722	0.476748	-9.33825	2.98491			D	2.66333	1.58473	0.485282	-2.55213	7.8788			D	0.51	0.953809	0.981463	-2.62906	3.64906
		P		1	0	0.477	0				E	14.30333*	1.8722	0.000132958	8.14175	20.4649			E	-6.92333*	1.58473	0.00956163	-12.1388	-1.70787			E	-7.38000*	0.953809	0.00011926	-10.5191	-4.24094
		COV362	S							B	A	-0.176667	1.8722	0.999979	-6.33825	5.98491		B	A	0.583333	1.58473	0.995426	-4.63213	5.7988		B	A	-0.643333	0.953809	0.957633	-3.7824	2.49573
			Control	si-NC	si-METTL3#1	pcDNA3.1	pcDNA3.1-METTL3				C	-18.70667*	1.8722	1.23765e-05	-24.8682	-12.5451			C	12.33333*	1.58473	0.000113437	7.11787	17.5488			C	6.13333*	0.953809	0.00055757	2.99427	9.2724
		1	30.34	28.32	15.07	26.64	37.88				D	-3.35333	1.8722	0.428289	-9.51491	2.80825			D	3.24667	1.58473	0.311412	-1.9688	8.46213			D	-0.133333	0.953809	0.999897	-3.2724	3.00573
		2	28.31	30.23	16.65	22.98	34.38				E	14.12667*	1.8722	0.000147839	7.96509	20.2882			E	-6.34000*	1.58473	0.0166928	-11.5555	-1.12453			E	-8.02333*	0.953809	5.77246e-05	-11.1624	-4.88427
		3	26.09	27.94	17.77	27.13	33.25			C	A	18.53000*	1.8722	1.3492e-05	12.3684	24.6916		C	A	-11.75000*	1.58473	0.000171554	-16.9655	-6.53453		C	A	-6.77667*	0.953809	0.000245689	-9.91573	-3.6376
		AV	28.2467	28.83	16.4967	25.5833	35.17				B	18.70667*	1.8722	1.23765e-05	12.5451	24.8682			B	-12.33333*	1.58473	0.000113437	-17.5488	-7.11787			B	-6.13333*	0.953809	0.00055757	-9.2724	-2.99427
		SD	2.12571	1.22723	1.35652	2.26783	2.41398				D	15.35333*	1.8722	7.21073e-05	9.19175	21.5149			D	-9.08667*	1.58473	0.0013751	-14.3021	-3.8712			D	-6.26667*	0.953809	0.000468445	-9.40573	-3.1276
		P		0.995	0	0.485	0.01				E	32.83333*	1.8722	6.09558e-08	26.6718	38.9949			E	-18.67333*	1.58473	2.70265e-06	-23.8888	-13.4579			E	-14.15667*	0.953809	3.04218e-07	-17.2957	-11.0176
		COV362	G2/M							D	A	3.17667	1.8722	0.476748	-2.98491	9.33825		D	A	-2.66333	1.58473	0.485282	-7.8788	2.55213		D	A	-0.51	0.953809	0.981463	-3.64906	2.62906
			Control	si-NC	si-METTL3#1	pcDNA3.1	pcDNA3.1-METTL3				B	3.35333	1.8722	0.428289	-2.80825	9.51491			B	-3.24667	1.58473	0.311412	-8.46213	1.9688			B	0.133333	0.953809	0.999897	-3.00573	3.2724
		1	13.7	12.65	5.89	11.93	19.77				C	-15.35333*	1.8722	7.21073e-05	-21.5149	-9.19175			C	9.08667*	1.58473	0.0013751	3.8712	14.3021			C	6.26667*	0.953809	0.000468445	3.1276	9.40573
		2	14.58	13.97	6.7	13.97	20.13				E	17.48000*	1.8722	2.28561e-05	11.3184	23.6416			E	-9.58667*	1.58473	0.000906914	-14.8021	-4.3712			E	-7.89000*	0.953809	6.68497e-05	-11.0291	-4.75094
		3	12.14	11.87	7.5	12.99	22.66			E	A	-14.30333*	1.8722	0.000132958	-20.4649	-8.14175		E	A	6.92333*	1.58473	0.00956163	1.70787	12.1388		E	A	7.38000*	0.953809	0.00011926	4.24094	10.5191
		AV	13.4733	12.83	6.69667	12.9633	20.8533				B	-14.12667*	1.8722	0.000147839	-20.2882	-7.96509			B	6.34000*	1.58473	0.0166928	1.12453	11.5555			B	8.02333*	0.953809	5.77246e-05	4.88427	11.1624
		SD	1.23569	1.06151	0.805005	1.02026	1.57494				C	-32.83333*	1.8722	6.09558e-08	-38.9949	-26.6718			C	18.67333*	1.58473	2.70265e-06	13.4579	23.8888			C	14.15667*	0.953809	3.04218e-07	11.0176	17.2957
		P		0.958	0	0.981	0				D	-17.48000*	1.8722	2.28561e-05	-23.6416	-11.3184			D	9.58667*	1.58473	0.000906914	4.3712	14.8021			D	7.89000*	0.953809	6.68497e-05	4.75094	11.0291
																									*. The mean difference is significant at the 0.05 level.

## Sheet: Figure 3A
			Control	si-NC	si-METTL3#1	pcDNA3.1	pcDNA3.1-METTL3
	Positive cells	1	13	10	72	17	4
		2	17	11	70	15	3
		3	10	7	75	12	4
	Total cells	1	339	347	327	374	383
		2	389	361	359	391	360
		3	347	367	318	360	392
	Percentage (%)	1	3.83481	2.88184	22.0183	4.54545	1.04439
		2	4.37018	3.04709	19.4986	3.83632	0.833333
		3	2.88184	1.90736	23.5849	3.33333	1.02041
		av	3.69561	2.6121	21.7006	3.90504	0.966043
		sd	0.753868	0.615891	2.06159	0.608975	0.115553
		P		0.126127	0.000104646	0.0609675	0.00119808

## Sheet: Figure 3B
Protein	Control	si-NC	si-METTL3#1	pcDNA3.1	pcDNA3.1-METTL3
GAPDH	31470.1	30198	31128	30974.9	31700
GAPDH	33053.8	31750	32654.3	32394.5	33282.2
GAPDH	29902	28644.6	29648.8	29394.5	30216.2
AV	31475.3	30197.6	31143.7	30921.3	31732.8
SD	1575.91	1552.72	1502.84	1500.71	1533.25
Protein	Control	si-NC	si-METTL3#1	pcDNA3.1	pcDNA3.1-METTL3
FAS	7756.8	6152.39	23252.3	8991.75	2580.73
FAS	7348.28	5802.99	22089.8	8476.97	2434.53
FAS	8059.94	6480.08	24206.5	9388.83	2672.55
GAPDH	31470.1	30198	31128	30974.9	31700
GAPDH	33053.8	31750	32654.3	32394.5	33282.2
GAPDH	29902	28644.6	29648.8	29394.5	30216.2
FAS/GAPDH	0.246481	0.203735	0.746989	0.290292	0.081411
FAS/GAPDH	0.222313	0.182771	0.676475	0.26168	0.0731481
FAS/GAPDH	0.269545	0.226224	0.816442	0.319408	0.0884476
av	0.246113	0.204243	0.746635	0.29046	0.0810022
Statistical data	1.0015	0.827809	3.03515	1.17951	0.330787
	0.903295	0.74263	2.74863	1.06325	0.297213
	1.09521	0.919185	3.31734	1.29781	0.359378
av	1	0.829875	3.03371	1.18019	0.329126
sd	0.0959658	0.0882957	0.284357	0.117282	0.0311156
P		0.086718	0.000213395	0.108516	0.000263454
Protein	Control	si-NC	si-METTL3#1	pcDNA3.1	pcDNA3.1-METTL3
FADD	25872.8	24109.2	24213.1	22739.4	25823.7
FADD	24515.7	22626.7	22587.4	21208.9	24745
FADD	26980.6	25328.5	25619.2	23887.2	26759.2
GAPDH	31470.1	30198	31128	30974.9	31700
GAPDH	33053.8	31750	32654.3	32394.5	33282.2
GAPDH	29902	28644.6	29648.8	29394.5	30216.2
FADD/GAPDH	0.822138	0.798371	0.777856	0.734124	0.814627
FADD/GAPDH	0.741693	0.712652	0.691713	0.654708	0.743489
FADD/GAPDH	0.902302	0.884232	0.864089	0.812642	0.885589
av	0.822044	0.798418	0.777886	0.733825	0.814568
Statistical data	1.00011	0.971202	0.946246	0.893047	0.990977
	0.902254	0.866927	0.841454	0.796439	0.904439
	1.09763	1.07565	1.05115	0.988562	1.0773
av	1	0.97126	0.946283	0.892683	0.990905
sd	0.0976892	0.104362	0.104846	0.0960619	0.0864306
P		0.74522	0.784492	0.246392	0.258357
Protein	Control	si-NC	si-METTL3#1	pcDNA3.1	pcDNA3.1-METTL3
p-FADD	20412.3	16676	27596.3	21662.6	12058.8
p-FADD	21392.8	17353.7	28251.4	22315.3	12729.8
p-FADD	19029.6	15661.4	26345.1	20382.6	11229.1
FADD	25872.8	24109.2	24213.1	22739.4	25823.7
FADD	24515.7	22626.7	22587.4	21208.9	24745
FADD	26980.6	25328.5	25619.2	23887.2	26759.2
p-FADD/FADD	0.788947	0.691685	1.13972	0.952648	0.466967
p-FADD/FADD	0.872615	0.766956	1.25076	1.05216	0.514441
p-FADD/FADD	0.705308	0.618331	1.02833	0.853285	0.419635
av	0.788956	0.692324	1.13961	0.952699	0.467015
Statistical data	0.999988	0.876708	1.4446	1.20748	0.591879
	1.10604	0.972114	1.58533	1.33362	0.652053
	0.893975	0.783732	1.30341	1.08154	0.531887
av	1	0.877518	1.44445	1.20754	0.59194
sd	0.106031	0.0941935	0.14096	0.126039	0.0600831
P		0.209035	0.00441681	0.0944787	0.00157944
Protein	Control	si-NC	si-METTL3#1	pcDNA3.1	pcDNA3.1-METTL3
caspase-8	22773.9	20754.1	33187.3	22129.8	6640.15
caspase-8	21522.2	19419.4	31290.7	20925.1	6241.38
caspase-8	23816	21852	34772.8	23012.7	6986.23
GAPDH	31470.1	30198	31128	30974.9	31700
GAPDH	33053.8	31750	32654.3	32394.5	33282.2
GAPDH	29902	28644.6	29648.8	29394.5	30216.2
caspase-8/GAPDH	0.723668	0.687267	1.06616	0.714444	0.209468
caspase-8/GAPDH	0.651125	0.611634	0.958239	0.645948	0.187529
caspase-8/GAPDH	0.79647	0.762867	1.17282	0.782893	0.231208
av	0.723754	0.687256	1.06574	0.714428	0.209402
Statistical data	0.99988	0.949586	1.47309	0.987136	0.289419
	0.89965	0.845085	1.32398	0.892496	0.259106
	1.10047	1.05404	1.62047	1.08171	0.319456
av	1	0.949571	1.47252	0.987114	0.289327
sd	0.10041	0.104478	0.148245	0.0946071	0.0301752
P		0.579164	0.00752092	0.879324	0.000261556
Protein	Control	si-NC	si-METTL3#1	pcDNA3.1	pcDNA3.1-METTL3
caspase-3	7382.27	8601.58	20790.1	8307.56	2644.51
caspase-3	6975.89	8104.41	19451.9	7788.11	2517.67
caspase-3	7725.27	9015.65	21932.4	8665.23	2709.33
GAPDH	31470.1	30198	31128	30974.9	31700
GAPDH	33053.8	31750	32654.3	32394.5	33282.2
GAPDH	29902	28644.6	29648.8	29394.5	30216.2
caspase-3/GAPDH	0.23458	0.284839	0.667891	0.268203	0.083423
caspase-3/GAPDH	0.211047	0.255257	0.595691	0.240415	0.0756462
caspase-3/GAPDH	0.258353	0.314742	0.739742	0.294791	0.0896647
av	0.23466	0.284946	0.667775	0.267803	0.0829113
Statistical data	0.99966	1.21384	2.84621	1.14295	0.355506
	0.899372	1.08777	2.53853	1.02452	0.322365
	1.10097	1.34127	3.1524	1.25625	0.382105
av	1	1.21429	2.84571	1.14124	0.353325
sd	0.100798	0.126748	0.306936	0.115872	0.0299295
P		0.0836753	0.00104625	0.186404	0.000337331
Protein	Control	si-NC	si-METTL3#1	pcDNA3.1	pcDNA3.1-METTL3
Bcl-2	19617.3	21266.7	2837.78	20374.5	27588.8
Bcl-2	18447.2	20318.3	2710.97	19478.3	25968.5
Bcl-2	20529.1	22011.3	2950.8	20987.7	28988.5
GAPDH	31470.1	30198	31128	30974.9	31700
GAPDH	33053.8	31750	32654.3	32394.5	33282.2
GAPDH	29902	28644.6	29648.8	29394.5	30216.2
Bcl-2/GAPDH	0.623361	0.704242	0.091165	0.657776	0.870309
Bcl-2/GAPDH	0.558095	0.639944	0.0830201	0.601284	0.780252
Bcl-2/GAPDH	0.686545	0.768429	0.0995253	0.714002	0.959368
av	0.622667	0.704205	0.0912368	0.657687	0.869976
Statistical data	1.00111	1.13101	0.14641	1.05638	1.39771
	0.896298	1.02775	0.13333	0.965658	1.25308
	1.10259	1.23409	0.159837	1.14668	1.54074
av	1	1.13095	0.146526	1.05624	1.39718
sd	0.10315	0.103173	0.013254	0.0905126	0.14383
P		0.195002	8.10889e-05	0.516985	0.025471
Protein	Control	si-NC	si-METTL3#1	pcDNA3.1	pcDNA3.1-METTL3
Bax	14201.7	15163.1	25946.3	16489.5	4976.85
Bax	13352.6	14223	24509.6	15471.3	4623.99
Bax	14849.6	15964.8	27251.4	17227.9	5273.28
GAPDH	31470.1	30198	31128	30974.9	31700
GAPDH	33053.8	31750	32654.3	32394.5	33282.2
GAPDH	29902	28644.6	29648.8	29394.5	30216.2
Bax/GAPDH	0.451275	0.502122	0.833538	0.532352	0.156998
Bax/GAPDH	0.403967	0.447969	0.750576	0.477591	0.138933
Bax/GAPDH	0.496608	0.55734	0.919141	0.586094	0.174518
av	0.450617	0.502477	0.834418	0.532012	0.156816
Statistical data	1.00146	1.1143	1.84977	1.18138	0.348408
	0.896475	0.994126	1.66566	1.05986	0.308317
	1.10206	1.23684	2.03974	1.30065	0.387288
av	1	1.11509	1.85173	1.18063	0.348004
sd	0.102802	0.121358	0.187045	0.120396	0.0394867
P		0.278349	0.00461554	0.119317	0.000339832

## Sheet: Figure 4A
			24 h											36 h											48 h
				0	30	40	50	60	65	70	80	Blank			0	30	40	50	60	65	70	80	Blank			NC组	30	40	50	60	65	70	80	空白组
			1	0.6685	0.6827	0.5809	0.6508	0.5017	0.3882	0.3107	0.2714	0.1899		1	0.9885	0.8056	0.7394	0.817	0.6192	0.6271	0.4356	0.3605	0.1963		1	1.4932	1.4759	1.443	1.0378	0.7504	0.6885	0.442	0.3499	0.168
			2	0.6573	0.6823	0.6108	0.5143	0.4772	0.4018	0.238	0.2584	0.123		2	0.8673	0.7947	0.777	0.8904	0.6825	0.5366	0.3988	0.3411	0.1294		2	1.4109	1.2154	0.9907	0.9637	0.8863	0.7673	0.486	0.3772	0.1226
			3	0.6163	0.4902	0.6908	0.5026	0.5334	0.4392	0.3044	0.215	0.0816		3	0.9663	0.9627	0.675	0.7209	0.5529	0.5021	0.3926	0.2651	0.0838		3	1.2393	1.1415	0.9211	0.8464	0.6994	0.6663	0.4285	0.2488	0.0839
			4	0.6611	0.5607	0.4718	0.5415	0.5611	0.4422	0.3464	0.2934	0.155		4	0.8111	0.8925	0.9228	0.8554	0.7794	0.5091	0.3474	0.3132	0.1599		4	1.1989	1.0709	1.0123	0.7796	0.6429	0.5111	0.5655	0.4346	0.1399
			5	0.5338	0.6276	0.5381	0.4581	0.4672	0.3468	0.3451	0.2157	0.1166		5	0.7238	0.8024	0.8233	0.8116	0.6004	0.4266	0.3265	0.2755	0.1141		5	1.4089	1.1288	1.057	1.0645	0.5409	0.6838	0.4269	0.3595	0.1035
			6	0.5208	0.6577	0.6507	0.5943	0.4363	0.4142	0.3428	0.301	0.0964		6	0.9708	1.1638	0.9254	0.6747	0.7395	0.5558	0.3352	0.2472	0.0979		6	1.2855	1.1773	1.0758	0.8005	0.7788	0.6708	0.3075	0.3831	0.089
			AV	0.609633	0.616867	0.590517	0.5436	0.49615	0.4054	0.314567	0.25915	0.127083		AV	0.887967	0.903617	0.810483	0.795	0.662317	0.526217	0.372683	0.300433	0.130233		AV	1.33945	1.20163	1.08332	0.915417	0.71645	0.664633	0.442733	0.35885	0.117817
			SD	0.066442	0.076938	0.0787703	0.0691614	0.0456423	0.035544	0.0417697	0.0371813	0.0396536		SD	0.106199	0.143544	0.100514	0.081819	0.0868768	0.0662699	0.0429288	0.0450082	0.041731		SD	0.115119	0.14284	0.184422	0.123248	0.118665	0.0837744	0.0844814	0.0614075	0.0322944
			P		0.865113	0.659244	0.122588	0.00624221	5.78782e-05	3.36337e-06	5.23487e-07			P		0.834325	0.223432	0.120234	0.0024056	3.38048e-05	6.48795e-07	2.02276e-07			P值		0.0955783	0.0162214	0.000107087	3.29545e-06	3.98387e-07	2.74423e-08	4.8168e-09
				0	30	40	50	60	65	70	80				0	30	40	50	60	65	70	80				NC组	30	40	50	60	65	70	80
			1	1.12199	1.15142	0.940455	1.08531	0.776327	0.541118	0.380513	0.299071			1	1.13268	0.891299	0.803933	0.906343	0.645302	0.655728	0.403	0.303889			1	1.12586	1.11169	1.08476	0.753076	0.517818	0.467148	0.265369	0.189978
			2	1.09878	1.15059	1.00242	0.802438	0.725555	0.569302	0.229855	0.272131			2	0.972726	0.876914	0.853554	1.00321	0.72884	0.536292	0.354434	0.278286			2	1.05849	0.898456	0.714522	0.69242	0.629062	0.531652	0.301386	0.212325
			3	1.01382	0.752495	1.1682	0.778192	0.84202	0.646807	0.367458	0.182192			3	1.10338	1.09863	0.718942	0.779518	0.557804	0.490762	0.346252	0.177987			3	0.91802	0.837963	0.657549	0.596401	0.47607	0.448975	0.254318	0.10722
			4	1.10666	0.898594	0.714365	0.858806	0.899423	0.653024	0.454495	0.344662			4	0.898557	1.00598	1.04597	0.957021	0.856722	0.5	0.2866	0.241466			4	0.884949	0.780171	0.732203	0.54172	0.429821	0.321932	0.366463	0.259311
			5	0.842849	1.03723	0.85176	0.685974	0.704832	0.455324	0.451801	0.183642			5	0.783345	0.887075	0.914658	0.899217	0.620491	0.391123	0.259018	0.191712			5	1.05685	0.827567	0.768793	0.774932	0.346326	0.4633	0.253008	0.197836
			6	0.815909	1.09961	1.0851	0.968224	0.640797	0.594999	0.447035	0.360412			6	1.10932	1.36402	1.0494	0.718547	0.804065	0.561631	0.2705	0.154364			6	0.955838	0.867268	0.784182	0.558828	0.541065	0.452659	0.15527	0.217155
			AV	1	1.01499	0.960384	0.863158	0.764826	0.576762	0.388526	0.273685			AV	1	1.02065	0.897743	0.87731	0.702204	0.522589	0.319967	0.224617			AV	1	0.887187	0.790335	0.652896	0.490027	0.447611	0.265969	0.197304
			SD	0.137689	0.15944	0.163238	0.143325	0.0945856	0.0736587	0.0865603	0.0770516			SD	0.140153	0.189439	0.13265	0.107979	0.114653	0.0874581	0.0566542	0.0593984			SD	0.094234	0.116925	0.150963	0.100888	0.0971366	0.0685757	0.0691545	0.0502667
			P		0.865113	0.659244	0.122588	0.00624221	5.78782e-05	3.36337e-06	5.23487e-07			P		0.834325	0.223432	0.120234	0.0024056	3.38048e-05	6.48795e-07	2.02276e-07			P值		0.0955783	0.0162214	0.000107087	3.29545e-06	3.98387e-07	2.74423e-08	4.8168e-09

## Sheet: Figure 4B-4C
		UL	UR	LR	LL	Apoptosis rate
	1	2.17	2.55	8.33	87	10.88				Cells	Control	Sul (20 μM）	Sul (40 μM）	Sul (60 μM）
	2	1.2	1.69	7.66	89.4	9.35				1	10.88	13.68	14.38	19.07
	3	0.99	1.72	7.33	90	9.05				2	9.35	11.06	16.4	22.42
	4	2.24	3.18	10.5	84	13.68				3	9.05	11.7	17.88	25.3
	5	1.18	1.94	9.12	87.8	11.06				AV	9.76	12.1467	16.22	22.2633
	6	1.4	2.13	9.57	86.9	11.7				SD	0.981478	1.36592	1.75693	3.11795
	7	2.07	3.08	11.3	83.6	14.38				P		0.0698621	0.00512395	0.0026922
	8	2.21	3.7	12.7	81.4	16.4							0.0338489	0.00675561
	9	2.86	4.78	13.1	79.2	17.88
	10	2.62	4.97	14.1	78.3	19.07
	11	2.98	6.02	16.4	74.6	22.42
	12	3.79	8.1	17.2	70.9	25.3

## Sheet: Figure 4D
				1	2	3	4	5	6	7	8	9	10	11	12
			A	23.47	23.53	23.67	23.51	23.66	23.71	24.09	24.05	24.24	24.4	24.35	24.61
			B	21.79	21.86	21.98	21.61	21.51	21.26	21.17	21.08	21.3	20.95	20.87	20.63
			C	28.81	28.96	28.98	28.39	28.54	28.59	28.34	28.02	28.27	27.9	28.03	28.08
			D	26.06	26.2	26.23	26.38	26.59	26.49	26.83	26.91	26.99	27.35	27.65	27.37
			E	19.04	18.96	18.92	18.98	18.91	18.9	19.09	18.98	18.94	18.94	18.86	18.87
			F
			G
			H
																							Amplification curve											Melting curve
				Control	Sul (20 μM）	Sul (40 μM）	Sul (60 μM）				Control	Sul (20 μM）	Sul (40 μM）	Sul (60 μM）			KRT8
			KRT8	23.47	23.51	24.09	24.4			FAS	21.79	21.61	21.17	20.95
			KRT8	23.53	23.66	24.05	24.35			FAS	21.86	21.51	21.08	20.87
			KRT8	23.67	23.71	24.24	24.61			FAS	21.98	21.26	21.3	20.63
			GAPDH	19.04	18.98	19.09	18.94			GAPDH	19.04	18.98	19.09	18.94
			GAPDH	18.96	18.91	18.98	18.86			GAPDH	18.96	18.91	18.98	18.86
			GAPDH	18.92	18.9	18.94	18.87			GAPDH	18.92	18.9	18.94	18.87
			av	18.9733	18.93	19.0033	18.89			av	18.9733	18.93	19.0033	18.89
			ΔCt	4.43	4.53	5	5.46			ΔCt	2.75	2.63	2.08	2.01
				4.57	4.75	5.07	5.49				2.9	2.6	2.1	2.01
				4.75	4.81	5.3	5.74				3.06	2.36	2.36	1.76
			av	4.58333	4.69667	5.12333	5.56333			av	2.90333	2.53	2.18	1.92667
			ΔΔCt	-0.153333	-0.0533333	0.416667	0.876667			ΔΔCt	-0.153333	-0.273333	-0.823333	-0.893333
				-0.0133333	0.166667	0.486667	0.906667				-0.00333333	-0.303333	-0.803333	-0.893333
				0.166667	0.226667	0.716667	1.15667				0.156667	-0.543333	-0.543333	-1.14333
			2^(-ΔΔCt)	1.11214	1.03766	0.749154	0.544624			2^(-ΔΔCt)	1.11214	1.2086	1.76949	1.85746
				1.00928	0.890899	0.713672	0.533416				1.00231	1.23399	1.74513	1.85746			FAS
				0.890899	0.854607	0.608502	0.448548				0.897095	1.45734	1.45734	2.20891
			av	1.00411	0.927722	0.690442	0.508863			av	1.00385	1.29998	1.65732	1.97461
			sd	0.11071	0.0969227	0.0731467	0.0525341			sd	0.107529	0.136869	0.173617	0.202907
			p		0.419408	0.0149222	0.00219216			p		0.0421034	0.00518274	0.00185126
						0.0276678	0.00276057						0.0488309	0.00881285
				Control	Sul (20 μM）	Sul (40 μM）	Sul (60 μM）				Control	Sul (20 μM）	Sul (40 μM）	Sul (60 μM）
			IGF2BP2	28.81	28.39	28.34	27.9			METTL3	26.06	26.38	26.83	27.35
			IGF2BP2	28.96	28.54	28.02	28.03			METTL3	26.2	26.59	26.91	27.65
			IGF2BP2	28.98	28.59	28.27	28.08			METTL3	26.23	26.49	26.99	27.37
			GAPDH	19.04	18.98	19.09	18.94			GAPDH	19.04	18.98	19.09	18.94
			GAPDH	18.96	18.91	18.98	18.86			GAPDH	18.96	18.91	18.98	18.86
			GAPDH	18.92	18.9	18.94	18.87			GAPDH	18.92	18.9	18.94	18.87
			av	18.9733	18.93	19.0033	18.89			av	18.9733	18.93	19.0033	18.89
			ΔCt	9.77	9.41	9.25	8.96			ΔCt	7.02	7.4	7.74	8.41			IGF2BP2
				10	9.63	9.04	9.17				7.24	7.68	7.93	8.79
				10.06	9.69	9.33	9.21				7.31	7.59	8.05	8.5
			av	9.94333	9.57667	9.20667	9.11333			av	7.19	7.55667	7.90667	8.56667
			ΔΔCt	-0.173333	-0.533333	-0.693333	-0.983333			ΔΔCt	-0.17	0.21	0.55	1.22
				0.0566667	-0.313333	-0.903333	-0.773333				0.05	0.49	0.74	1.6
				0.116667	-0.253333	-0.613333	-0.733333				0.12	0.4	0.86	1.31
			2^(-ΔΔCt)	1.12766	1.44727	1.61702	1.97703			2^(-ΔΔCt)	1.12506	0.864537	0.68302	0.429283
				0.961483	1.24258	1.87038	1.70921				0.965936	0.712025	0.598739	0.329877
				0.922316	1.19196	1.52979	1.66248				0.920188	0.757858	0.550953	0.403321
			av	1.00382	1.29393	1.6724	1.78291			av	1.00373	0.77814	0.610904	0.387494
			sd	0.109023	0.135182	0.176921	0.169731			sd	0.107537	0.0782528	0.0668689	0.0515583
			p		0.0444099	0.00508255	0.00259749			p		0.042477	0.00579574	0.000862113
						0.0422173	0.0174951						0.0481152	0.00195138
																	METTL3
																	GAPDH

[truncated: 3 more sheets: Figure 5A, Figure 5B, Figure 5C]
